# Supplementary material
Source: publisher site journal article supplement (https://www.dovepress.com/article/282308)
Supplement: Supplementary file 1 [file get_supplementary_file.php]

**Supplementary materials**

**Supplementary text S1: detailed descriptive content analysis**

**Outer setting**

*External policy and incentives*

The structure of the Australian health care system, which is split into public and private healthcare sectors, was identified as a barrier to effective blood management, in general. (1). Participants pointed out that, in the public system, medical staff are employed by health facilities, and therefore, hospitals have greater influence over the provision of care. In the private sector, medical staff are far more autonomous and can be resistant to process-driven, standardised care (1-4). This model also impacts the way patient care is funded. One of the executive staff participants reported “a perverse incentive in the private setting around how we fund certain things. Prescribing a blood transfusion triggers a payment to the doctor” (despite evidence suggesting we should be working towards reducing the number of blood transfusions). This means that the prescriber is rewarded for giving a blood transfusion, and thus, the motivation to prevent them could be impacted. Additionally, it was acknowledged that hospital funding could be reduced depending on the quality of care, but this is not felt by private prescribers, who receive reimbursement regardless of whether care reflected good decision making.

*Patient needs and resources*

Multiple perspectives informed this barrier, including those of the patient, surgeon, and ward nurses. Patients explained that they were often not given information about anaemia or screening before surgery. When asked if they received any information about preoperative preparation, they advised their source of information came from “Mrs Google”. It also emerged that patients were not actively involved in their decision making and care choices, and can make decisions without being informed of the potential risks. Patients often just trust in the recommendations of the doctor with Ward nurses sharing that often patients “…just take advice from the doctors”.

Patients also expressed some reluctance to delay procedures to optimise anaemia because of pain and other factors. One patient was asked if they would consider a delay in surgery to optimise their anaemia, they responded “If there was no other option, I would accept it, but before (surgery), I have severe pain, I have to stop exercising, and I was putting on weight, and just thinking about being home (while potentially waiting longer for surgery as a result of anaemia treatment). It wasn’t really that good.” It was also noted that for the clinicians, getting patients to return to have blood tests could be difficult. The surgeon stated that “…getting patients to come back on multiple occasions to the hospital when they are anaemic can be difficult at the best of times.”

**Inner setting**

*Structural characteristics*

*Structural characteristics* were evident as a barrier across multiple actor categories, including executive, pre-admission, blood bank and haematology staff. Interview responses highlighted the different care models and how this impedes care standardisation. Executive staff pointed out that the different model of care is an issue because the “public model would see a lot more clinicians involved in maintaining a standard of care.” Other staff shared this sentiment, including the pre-admission staff member who commented “…there is a definite difference in process. Most private consultants use their own private physician who decides what that patient requires and I'm not aware of the level of workup…however, our level of workup here in the public appears to be more robust.”

Structural characteristics were also a barrier in terms of the physical environment, and how that creates “silos” in health care facilities, which can impede the level of collaboration that occurs and quality of communication. The blood bank and haematology staff felt their major barrier was that they are not visible to clinicians “…and because we are shut away, they don't see A) how hard we work or B) that we are very patient focused.”

*Networks and communications*

The participants from clinical governance, haematology, and preadmissions mentioned that limited interprofessional relationships, opportunities for communication and knowing who can help with improvements were a barrier to Patient Blood Management (PBM). Some participants felt the physical distance and geographic location prevented them from building quality relationships with staff in other areas. When asked about questioning PBM practice, the laboratory haematologist commented “…potentially it can be a little bit of an awkward discussion if you're challenging someone's management. So especially if it's, as you said, a very senior and experienced person who has been doing something somewhere for a long time. You'd have to have personality to be able to deal with those interactions.”

Having the opportunity to communicate with staff in other areas through being invited to meetings to explain audit results or safety campaigns was another identified barrier. Opportunities for networking and communicating were reported as limited by clinical governance staff who stated “…I think there's a gap there in having the opportunity to attend meetings where audit results might be getting discussed, and then having the opportunity to, I guess, have some input and try and give examples of what the results are trying to say. I don't think we're given that opportunity.”

Participants stated that it was difficult to know who to go to in order to obtain assistance. There was an identified barrier in terms of knowing where to go for help with new initiatives or troubleshooting new policy. The preadmissions staff member advised “…there’s too many layers. So I have to go through about five people to get to the person I need: One person does the marketing, one does the clinical forms, one does the nonclinical forms, one does the patient information... none of them speak to each other and it's awful.”

*Implementation climate - Relative priority*

It was noted by one of the participants that PAST-P was not considered a high priority by some in the organisation as it is not perceived as being appealing or interesting by clinical and executive staff. The preadmissions staff member felt that the climate was not ideal in terms of relative priority and stated *“…I think they're disengaged with making further improvements because there are further improvements that can be made…but It's (PAST-P) a pretty dry subject for people and not many people are passionate about it. So, it's very low on the list of priorities.”*

*Readiness for implementation- Available resources*

The differences between public and private models of care, and the facilities and resources available to clinicians and patients was identified as a barrier. The public model has more resources for preoperative workup, in contrast to the private sector, where this is minimal due to funding arrangements. The surgeon pointed out that in the private, “…the facility for fixing someone's anaemia preoperatively is a more difficult path to go down because in the public sphere they get sent to the pre-admission clinic, the preoperative team look after it, and they manage the preoperative anaemia. In the private sphere, there isn't a centralised service such as that. So, you'd have to book a haematologist, or go back to a GP to determine what would be appropriate blood transfusion, or blood correction of anaemia.”

Available resources were also a barrier due to time available to staff to enact and implement change through relationship building with clinicians on the floor. Clinical governance stated it was a barrier because of a “..time factor, with your expectations of what needs to be done, and what sometimes can take over your priority for the day, means that you actually don't get to do the things which is the ideal, of actually going out there and being at the coalface”.

*Readiness for implementation - access to knowledge and information*

Multiple participants from the patient, surgical resident, executive and clinical governance categories, noted *access to knowledge and information* is an issue where either patients or staff don’t know where to access information, can’t access it flexibly, have too much to sift through or receive it in such a distilled form that it loses meaning. The patients explained that they were not given much information about their procedure or preparing for it and had to look elsewhere for guidance.

It was also said that having externally accessible resources available to clinicians would be useful, rather than requiring their presence on campus to access them through the intranet. Clinical governance stated “I think one big gap is the accessibility of our documents, particularly for medical staff. So, having them easily available on the internet, or an app by the phone, just some way that they can get access to our documents to review different things” (would be helpful).

Access was also an issue in regard to the way in which information and reports are delivered to staff. Executive staff commented that “There's a lower level of awareness amongst the private specialists. Whilst regular communications go out to them, they're usually in an abbreviated format and with the amount of policy updates and production, they don't see as much detail as an employed doctor would see. So, one of the big areas that's challenging is the private sector.”

**Individual characteristics**

*Knowledge and beliefs about the intervention*

Participants across the categories of anaesthetist, surgical resident, senior medical consultant, ward nurses, clinical governance, clinical and lab haematologists, described the variation in practice amongst teams providing care, and a lack of education as being a significant barrier to PAST-P. Variation in practice is evident across the organisation as outlined in previous audits, and was acknowledged throughout the interview process(5). The anaesthetist commented:

“…patients don't necessarily get the blood tests, and if they get blood test, it's analysing the blood tests appropriately. Which, for example, I'm picking the example of ferritin as a number. Someone's got a haemoglobin of 108 and the ferritin is 31 and they come in for a major surgery. The ferritin is just one above the reference range, which satisfies the GP and the surgeon. They could all be happy with that, but as far as I'm concerned, it significantly increases the risk of a blood transfusion in the perioperative period.”

The lack of education provided to medical staff was also raised as a barrier. The surgical resident supported that education should be improved “…they have an idea, but I don't think it is enough. If there is more information, especially for the junior doctor, if you're working in the same field for a while, yes you will get it. But if you are a junior doctor, you will not know exactly what you are supposed to do and what the guideline is saying.”

Individual beliefs about care provision were also described as a barrier to standardised care delivery. Perhaps the most compelling statement came from the senior medical consultant who stated that “People’s beliefs are probably the biggest barriers we have”. He explained that “I think it's purported to be strong science but so was the evidence behind previous iterations of the guidelines. And obviously, if they're different, they both can't be right, but they're both alleging they're right.”

*Self-efficacy*

Health professionals noted a level of discomfort with the idea of speaking up for best practice. When asked whether or not they feel comfortable to speak up for best practice, self-efficacy was recognised as a barrier in the self-acknowledgement that “We probably don't speak up enough. We definitely don't inquire as to is this necessary, it's really not something that is done very well. We don't necessarily have the... you know, the haemoglobin’s ninety-eight and completely asymptomatic and maybe they don't need that bag of blood today.”

**Process**

*Executing*

The absence of a policy that supports best practice was identified as a barrier by the anaesthetist. Currently, there is no standardised PAST-P, and existing policies prevent staff from engaging in best practice. The anaesthetist commented, “If any policy says you shouldn't have given IV Iron under anaesthesia it creates a barrier, because even if you're doing what's in the best interest of patients, if they were one of the rare people and had adverse reactions, you would feel unsupported because you're going directly against the guideline”.

1. Duckett SJ. Living in the parallel universe in Australia: public Medicare and private hospitals. Cmaj. 2005;173(7):745-7. Epub 2005/09/15. doi: 10.1503/cmaj.051011. PubMed PMID: 16157707; PubMed Central PMCID: PMCPMC1216309.

2. Morgan PN, Coleman PL, Martinez-Garduno CM, Gunaratne AW, McInnes E, Middleton S. Implementation of a patient blood management program in an Australian private hospital orthopedic unit. J Blood Med. 2018;9:83-90. Epub 2018/06/29. doi: 10.2147/JBM.S157571. PubMed PMID: 29950914; PubMed Central PMCID: PMCPMC6014436.

3. Delaforce A, Duff J, Munday J, Hardy J. Overcoming barriers to evidence-based patient blood management: a restricted review. Implement Sci. 2020;15(1):6. Epub 2020/01/19. doi: 10.1186/s13012-020-0965-4. PubMed PMID: 31952514; PubMed Central PMCID: PMCPMC6969479.

4. Pearse B, Keogh S, Rickard C, Fung L. Research Article – BMC Health Service Research (IF -1.93) Barriers and Facilitators to Implementing Evidence Based Bleeding Management in Australian Cardiac Surgery Units: A Qualitative Interview Study Analysed With the Theoretical Domains Framework and COM-B Model2020.

5. Delaforce A, Moore D, Duff J, Munday J, Hardy J. Assessing transfusion practice in elective surgical patients: a baseline audit. ISBT Science Series. 2019;14(4):415-22. doi: 10.1111/voxs.12496.
